# Supplementary material for: Vertical saccadic palsy and foveal retinal thinning in Niemann-Pick disease type C
Source: PubMed Central journal article supplement (PMC8177533; doi:10.1371/journal.pone.0252825), 2021-06-04
Supplement: pone.0252825.s001.pdf [file pone.0252825.s001.pdf]

S1 Table. Clinical data of NPC patients.

| ID | Age | Age of specific symptoms / at diagnosis | First symptom(s)                                                                                 | Mutation analysis                                        | Filipin test (evaluation of the test results by the lab) | Chitotriosidase activity (normal value 20-100) (nmol/ml/h) | NPC Clinical Severity Score | SARA-Score | Neurologic symptoms                                                                                                 |
|----|-----|-----------------------------------------|--------------------------------------------------------------------------------------------------|----------------------------------------------------------|----------------------------------------------------------|------------------------------------------------------------|-----------------------------|------------|---------------------------------------------------------------------------------------------------------------------|
| 1  | 26  | 21                                      | jaundice, restlessness, stuttering, loss of educational skills, saccades                         | compound heterozygosity NPC1 gene [p.Y825C/p.A1054T]     | classical NPC phenotype                                  | 349                                                        | 8                           | 13         | cognitive impairment, ataxia, dystonia, dysarthrophonia bilateral hearing loss                                      |
| 2  | 18  | 10                                      | hepatosplenomegaly, impaired motor development, neurologic abnormalities                         | compound heterozygosity NPC1 gene [p.S940L/p.P1007A]     | N.A.                                                     | 1492                                                       | 11                          | 26         | cognitive impairment, ataxia, cataplexy, epilepsy                                                                   |
| 3  | 43  | 34                                      | progressive cognitive impairment, coordination difficulties, lack of motivation, depressive mood | compound heterozygosity NPC1 gene [p.P434L/p.I1061T]     | clearly positive                                         | 3200                                                       | 11                          | N.A.       | dementia, ataxia, dystonia, dysarthria, personality disorder, depression                                            |
| 4  | 10  | 7                                       | delayed motor development, dysarthria                                                            | compound heterozygosity NPC1 gene [p.A97V/p.S1004P]      | N.A.                                                     | 203                                                        | 9                           | N.A.       | cognitive impairment, ataxia, dysarthria, cataplexy, epilepsy                                                       |
| 5  | 7   | 4                                       | impaired speech development                                                                      | compound heterozygosity NPC1 gene [p.A97V/p.S1004P]      | N.A.                                                     | N.A.                                                       | 5                           | N.A.       | cognitive impairment, ataxia, dysarthria, dysphagia, cataplexy                                                      |
| 6  | 17  | 10                                      | dysarthria                                                                                       | homozygous NPC1 gene [p.G1162 A/p.G1162 A]               | massively positive                                       | 1*                                                         | 2                           | 3          | cognitive impairment, dysmetria                                                                                     |
| 7  | 28  | 21                                      | forgetfulness, psychosis                                                                         | homozygous NPC1 gene [p.G1162A/p.G1162A]                 | N.A.                                                     | 338                                                        | 8                           | 13         | cognitive impairment, ataxia, dysarthria, dysphagia                                                                 |
| 8  | 21  | 14                                      | loss of educational skills, motor and coordination disorder                                      | compound heterozygosity NPC1 gene [p.S954L/p.IVS23+1G>A] | significantly positive                                   | 116                                                        | 12                          | 15         | cognitive impairment, ataxia, dystonia, dysarthria, dysmetria, dysdiadochokinesia, epilepsy, bilateral hearing loss |
| 9  | 14  | 11                                      | seizures                                                                                         | compound heterozygosity NPC1 gene [p.IVS1+2T>c/p.P1007A] | positive                                                 | 418                                                        | N.A.                        | N.A.       | cognitive impairment, ataxia, dysarthria, epilepsy, dystonia                                                        |
| 10 | 8   | 8                                       | enuresis                                                                                         | compound heterozygosity NPC1 gene [p.S954L/p.S849I]      | N.A.                                                     | 244                                                        | 4                           | 0          | ataxia, bilateral hearing loss                                                                                      |
| 11 | 18  | 12                                      | cognitive impairment                                                                             | no mutation detected in NPC1+2 gene (null mutation)      | classical NPC phenotype                                  | 38                                                         | 8                           | 7          | cognitive impairment, ataxia, dysmetria, dysarthria                                                                 |
| 12 | 7   | 5                                       | loss of cognitive and motor skills                                                               | compound heterozygosity NPC1 gene [p.fs1005*/p.P1007A]   | N.A.                                                     | 279                                                        | N.A.                        | N.A.       | development delay, ataxia                                                                                           |
| 13 | 6   | 4                                       | feeding difficulties, developmental delay                                                        | compound heterozygosity NPC1 gene [p.1061T/p.Q447Tfs*12] | massively positive                                       | 699                                                        | N.A.                        | N.A.       | cognitive impairment, ataxia, dysmetria, muscular hypotonia                                                         |
| 14 | 14  | 8                                       | hepatosplenomegaly                                                                               | compound heterozygosity NPC1 gene [p.M1001V/p.R404W]     |                                                          | 323                                                        | N.A.                        | N.A.       | cognitive impairment, cataplexy, dysarthria, dystonia, epilepsy                                                     |
| 15 | 21  | 17                                      | developmental delay                                                                              | heterozygosity NPC1 gene [p.P237S/-]                     | significantly increased                                  | 63                                                         | N.A.                        | 12         | mental retardation, ataxia, dysarthria, dysphagia, dysmetria                                                        |
| 16 | 21  | Child-hood                              | stuttering, disturbed eye movements                                                              | compound heterozygosity NPC1 gene [p.I1061T /p.P1007A]   | N.A.                                                     | N.A.                                                       | 8                           | 7          | cognitive impairment, ataxia, dysarthria, dysphagia,                                                                |
| 17 | 20  | 20                                      | learning disability, gross and fine motor weakness                                               | compound heterozygosity NPC1 gene [p.I1061T/p.A1151T]    | N.A.                                                     | 160                                                        | N.A.                        | 11         | cognitive impairment, Ataxia, dysmetria, dysdiadochokinesia, dysarthria, epilepsy                                   |
| 18 | 19  | 4                                       | protruding abdomen, thrombopenia                                                                 | compound heterozygosity NPC1 gene [p.I1061T/p.E1188X]    | N.A.                                                     | 736                                                        | N.A.                        | 16         | Ataxia, dysarthria, cataplexy, dysphagia, dystonia, epilepsy                                                        |

\*null mutation
