# Supplementary material for: Vertical saccadic palsy and foveal retinal thinning in Niemann-Pick disease type C
Source: PubMed Central journal article supplement (PMC8177533; doi:10.1371/journal.pone.0252825), 2021-06-04
Supplement: pone.0252825.s002.pdf [file pone.0252825.s002.pdf]

S2 Table. Peripapillary retinal nerve fibre layer thickness in NPC eyes and controls.

| <i>Peripapillary RNFL<br/>Mean (SD) [<math>\mu\text{m}</math>]</i> | <i>Control eyes<br/>(n= 178)</i> | <i>NPC eyes<br/>(n=14)</i> | <i>p-value</i> |
|--------------------------------------------------------------------|----------------------------------|----------------------------|----------------|
| Global (average)                                                   | 96.7 (9.8)                       | 99.9 (8.1)                 | 0.37 (0.28)    |
| Nasal-inferior                                                     | 105.8 (23.6)                     | 103.2 (19.5)               | 0.76 (0.70)    |
| Nasal                                                              | 73.6 (15.6)                      | 77.9 (10.7)                | 0.44 (0.22)    |
| Nasal-superior                                                     | 106.3 (19.8)                     | 103.6 (11.5)               | 0.71 (0.93)    |
| Temporal-superior                                                  | 135.0 (18.0)                     | 140.2 (14.6)               | 0.41 (0.48)    |
| Temporal                                                           | 69.9 (10.5)                      | 73.4 (8.8)                 | 0.35 (0.58)    |
| Temporal-inferior                                                  | 139.3 (19.3)                     | 150.1 (20.4)               | 0.1 (0.11)     |

RNFL = retinal nerve fibre layer, SD = standard deviation.
