# Supplementary material for: Vertical saccadic palsy and foveal retinal thinning in Niemann-Pick disease type C
Source: PubMed Central journal article supplement (PMC8177533; doi:10.1371/journal.pone.0252825), 2021-06-04
Supplement: pone.0252825.s003.pdf [file pone.0252825.s003.pdf]

S3 Table. Reported ocular abnormalities in Niemann-Pick disease type C.

| Structure                | Number of patients studied                                  | Ocular abnormality                                                                                                                                                                                                                                                                          | Age (years)                                               | References                          |         |                                         |
|--------------------------|-------------------------------------------------------------|---------------------------------------------------------------------------------------------------------------------------------------------------------------------------------------------------------------------------------------------------------------------------------------------|-----------------------------------------------------------|-------------------------------------|---------|-----------------------------------------|
| Conjunctiva              | 1                                                           | Abnormal ultrastructure (lamellar cytoplasmic bodies)                                                                                                                                                                                                                                       | 5                                                         | Merin et al., 1980 [15]             |         |                                         |
| Anterior segments        | 1                                                           | Heterochromic iridocyclitis and vertical motility limitation                                                                                                                                                                                                                                | 26                                                        | Kianersi and Sonbolestan, 2017 [12] |         |                                         |
| Macula + optic disc      | 14                                                          | Spectral-domain OCT in NPC patients, mutation carriers and controls: lower volumes of macular retinal nerve fibre layer, and lower combined ganglion cell and inner plexiform layer in patients compared to controls (not in mutation carriers).                                            | 9-38                                                      | Havla et al. 2020 [14]              |         |                                         |
| Retina                   | -                                                           | NPC1 2-months-old mice: Impaired visual function, accumulation of lipofuscin in the retinal pigment epithelium layer, degeneration of photoreceptor outer segments, disruption of synaptic layers, increased autophagy markers in the ganglion cell layer, folds of the outer nuclear layer | -                                                         | Claudepierre et al., 2010 [13]      |         |                                         |
| <u>Oculomotor system</u> |                                                             | <u>Vertical gaze palsy (saccadic or pursuit palsy)</u>                                                                                                                                                                                                                                      | <u>Horizontal gaze palsy</u>                              | <u>Vestibulo-ocular reflex</u>      |         |                                         |
|                          | 2                                                           | X                                                                                                                                                                                                                                                                                           | X                                                         | Normal                              | 27, 34  | Lengyl et al., 1999 [16]                |
|                          | 1                                                           | X downwards, subsequently upwards                                                                                                                                                                                                                                                           | Normal                                                    | Normal                              | 8       | Shawkat et al., 1994 [17]               |
|                          | - (Review)                                                  | X                                                                                                                                                                                                                                                                                           | Relatively spared                                         | X                                   | -       | Salsano et al., 2012 [9]                |
|                          | 9                                                           | NA                                                                                                                                                                                                                                                                                          | X hypometria, and slightly reduced saccadic peak velocity | Normal                              | 18-49   | Abel et al., 2012 [18]                  |
|                          | 9                                                           | NA                                                                                                                                                                                                                                                                                          | X brain volumes correlate with saccadic gain              | NA                                  | 18-49   | Abel & Walterfang et al., 2012 [7,8,18] |
|                          | 1                                                           | Normal (asymptomatic: without VSGP, without neurological impairment)                                                                                                                                                                                                                        | NA                                                        | Normal                              | 66      | Greenberg et al., 2015 [19]             |
|                          | 472                                                         | X 68%                                                                                                                                                                                                                                                                                       | X 4.9%                                                    | NA                                  | 21 ± 15 | Patterson et al., 2015+2020 [3,5]       |
|                          | 11                                                          | X all patients                                                                                                                                                                                                                                                                              | X limitation of horizontal eye movements (n=1)            | NA                                  | 14 ± 8  | Chamova et al., 2016 [20]               |
|                          | 1                                                           | X 'Round the houses' sign                                                                                                                                                                                                                                                                   | NA                                                        | NA                                  | 59      | Eggink et al., 2016 [21]                |
|                          | 1                                                           | X saccades, optokinetic nystagmus, and smooth pursuit affected                                                                                                                                                                                                                              | NA                                                        | NA                                  | 1       | Bremova and Strupp, 2017 [22]           |
|                          | 2+3                                                         | X slower vertical peak velocity and greater curvature compared to 77 controls                                                                                                                                                                                                               | Almost entirely unaffected                                | NA                                  | 2-9     | Blundell et al., 2018 [23]              |
|                          | 1                                                           | X Impaired smooth pursuit, saccades and optokinetic nystagmus (more prominent in downward direction)                                                                                                                                                                                        | Relatively preserved                                      | NA                                  | 30      | Gupta et al., 2018 [24]                 |
|                          | 20 First-degree heterozygous relatives of patients with NPC | X shortened duration of reflexive saccades, prolonged duration of self-paced saccades, elevated gaze-holding nystagmus on up gaze                                                                                                                                                           | X reduced horizontal peak velocity of self-paced saccades | Normal in horizontal plane          | 53 ± 10 | Bremova et al. 2020 [29]                |

X= yes / abnormal
